# Supplementary material for: Determining high-precision Sr–Nd isotopic ratios of certified reference materials using thermal ionization mass spectrometry
Source: Royal Society of Chemistry journal article supplement (doi:10.1039/d4ja00162a), 2024-01-01
Supplement: d4ja00162a1.pdf [file d4ja00162a1.pdf]

## Supplementary Table

**Table S1:** Sr-Nd isotope data of CRMs downloaded from GeoReM - the Reference Material

Database
