# Supplementary material for: Determining high-precision Sr–Nd isotopic ratios of certified reference materials using thermal ionization mass spectrometry
Source: Royal Society of Chemistry journal article supplement (doi:10.1039/d4ja00162a), 2024-01-01
Supplement: d4ja00162a2.xlsx [file d4ja00162a2.xlsx]

## Sheet: Sheet1
	Sr-Nd isotope data of CRMs downloaded from GeoReM - the Reference Material Database; Date of Query: May 12. 2023
TableS1
	87Sr/86Sr	Error	GeoRem ID	143Nd/144Nd	Error	GeoRem ID			87Sr/86Sr	Error	GeoRem ID	143Nd/144Nd	Error	GeoRem ID			87Sr/86Sr	Error	GeoRem ID/Reference	143Nd/144Nd	Error	GeoRem ID/Reference			87Sr/86Sr	Error	GeoRem ID/Reference	143Nd/144Nd	Error	GeoRem ID/Reference			87Sr/86Sr	Error	GeoRem ID/Reference	143Nd/144Nd	Error	GeoRem ID/Reference			87Sr/86Sr	Error	GeoRem ID/Reference	143Nd/144Nd	Error	GeoRem ID/Reference			87Sr/86Sr
BCR-1								BHVO-2								JA-3								JB-3								JG-1a								JG-3								JGb-1
	0.705031	9e-06	GeoReM 10062	0.512626	4e-06	GeoReM 10062			0.703478	1.6e-05	GeoReM 10099	0.512995	1e-05	GeoReM 10104			0.704177	6e-06	GeoReM 6634	0.512853	8e-06	GeoReM 10689			0.703674	6e-06	GeoReM 7916	0.513065	2e-06	GeoReM 10017			0.710992	7e-06	GeoReM 10689	0.512334	1.6e-05	GeoReM 3164			0.705391	9e-06	GeoReM 11144	0.512612	1.5e-05	GeoReM 3164			0.705225
	0.705025	1.9e-05	GeoReM 1209	0.512607	9e-06	GeoReM 1026			0.703493	1.1e-05	GeoReM 10104	0.512971	3.9e-06	GeoReM 10224			0.704171	9e-06	GeoReM 7831	0.512848	1.2e-05	GeoReM 3164			0.703415	1.3e-05	GeoReM 8688	0.513025	4e-06	GeoReM 10820			0.710985	6e-06	GeoReM 10689	0.512331	1.4e-05	GeoReM 3164			0.705373	1e-05	GeoReM 11144	0.512644	1.3e-05	GeoReM 3164			0.705204
	0.705018	1.3e-05	GeoReM 1209	0.512621	2e-05	GeoReM 10494			0.703486	9e-06	GeoReM 10145	0.512975	3.5e-06	GeoReM 10224			0.704163	5e-06	Miyazaki and Shuto 1998	0.512829	1.2e-05	GeoReM 3164			0.703417	1.2e-05	GeoReM 8688	0.513053	1.8e-05	GeoReM 10820			0.710972	7e-06	GeoReM 10689	0.512354	1.2e-05	GeoReM 3164			0.705391	9e-06	GeoReM 12029	0.512624	1.2e-05	GeoReM 3164			0.705205
	0.705057	1.2e-05	GeoReM 3192	0.512624	5e-06	GeoReM 11584			0.703503	1.3e-05	GeoReM 10243	0.512979	9e-06	GeoReM 10243			0.704147	6e-06	Miyazaki and Shuto 1998	0.512835	1e-05	GeoReM 3164			0.703421	1.7e-05	GeoRem 8057	0.513049	1e-05	GeoReM 11231			0.710978	4e-06	GeoReM 10689	0.512359	9e-06	GeoReM 7225			0.705373	1e-05	GeoReM 12029	0.512625	7e-06	GeoReM 10921			0.705196
	0.704998	1.2e-05	GeoReM 3767	0.512635	7e-06	GeoReM 11966			0.703457	3e-06	GeoReM 10633	0.512974	1e-05	GeoReM 10554			0.714161	5e-06	Miyazaki and Shuto 1998	0.512839	1.5e-06	GeoReM 8496			0.703411	8e-06	GeoRem 8244	0.513065	1.1e-05	GeoReM 12030			0.710952	4e-06	GeoReM 10689	0.51237	1.5e-06	GeoReM 8496			0.70535	6e-06	Miyazaki and Shuto 1998	0.512604	7e-06	GeoReM 11144			0.705195
	0.704998	1.2e-05	GeoReM 4536	0.512629	1.4e-05	GeoReM 1209			0.703489	3e-06	GeoReM 10650	0.512987	2e-06	GeoReM 10633			0.704165	8e-06	Miyazaki and Shuto 1998						0.703448	1e-05	GeoRem 8255	0.513045	6e-06	GeoReM 12357			0.710992	8e-06	GeoReM 7225	0.512386	2.9e-06	GeoReM 8611			0.705379	8e-06	Miyazaki and Shuto 1998	0.512634	5e-06	GeoReM 11144
	0.705012	1.1e-05	GeoReM 5904	0.512638	6e-06	GeoReM 1209			0.703481	1e-05	GeoReM 10694	0.512984	5e-06	GeoReM 10650			0.704165	6e-06	Miyazaki and Shuto 1998						0.703375	2e-05	GeoRem 9936	0.513067	1.5e-05	GeoReM 3164			0.710976	1e-05	GeoReM 8611	0.512378	4.4e-06	GeoReM 8611			0.705352	6e-06	Miyazaki and Shuto 1998	0.51263	6e-06	GeoReM 11144
	0.705021	1.1e-05	GeoReM 6326	0.512626	1.5e-05	GeoReM 179			0.703476	1.2e-05	GeoReM 11113	0.512984	1.2e-05	GeoReM 10675											0.703406	5e-06	Miyazaki and Shuto 1998	0.513057	1.4e-05	GeoReM 3164			0.710971	8e-06	GeoReM 8611						0.705373	5e-06	Miyazaki and Shuto 1998	0.512621	3e-06	GeoReM 11161
	0.705014	5e-06	GeoReM 6680	0.512613	8e-06	GeoReM 1888			0.703468	8e-06	GeoReM 11134	0.512984	7e-06	GeoReM 10694											0.703412	5e-06	Miyazaki and Shuto 1998	0.513048	1.2e-05	GeoReM 3164			0.710962	5e-06	Miyazaki and Shuto 1998						0.705344	5e-06	Miyazaki and Shuto 1998	0.512604	7e-06	GeoReM 12029
	0.704988	7e-06	GeoReM 7473	0.512634	9e-06	GeoReM 1989			0.703458	8e-06	GeoReM 11389	0.512987	2e-05	GeoReM 10852											0.703407	5e-06	Miyazaki and Shuto 1998	0.513062	1e-05	GeoReM 3164			0.710967	8e-06	Miyazaki and Shuto 1998									0.512634	5e-06	GeoReM 12029
	0.704992	6e-06	GeoReM 7950	0.512627	1.5e-05	GeoReM 207			0.703458	2e-06	GeoReM 11403	0.512993	1.7e-05	GeoReM 10974											0.70341	5e-06	Miyazaki and Shuto 1998	0.513089	1.5e-05	GeoReM 4680			0.710964	6e-06	Miyazaki and Shuto 1998									0.51263	6e-06	GeoReM 12029
	0.705014	5e-06	GeoReM 7990	0.512638	1.3e-05	GeoReM 209			0.703491	6e-06	GeoReM 12019	0.512972	8e-06	GeoReM 11113											0.703416	5e-06	Miyazaki and Shuto 1998	0.513064	2.1e-05	GeoReM 5487			0.710989	7e-06	Miyazaki and Shuto 1998
	0.704993	9e-06	GeoReM 9801	0.512636	1.9e-05	GeoReM 233			0.703487	1.9e-05	GeoReM 1209	0.512985	3e-06	GeoReM 11134														0.513062	1.3e-05	GeoReM 6380			0.710967	6e-06	Miyazaki and Shuto 1998
				0.512633	4e-06	GeoReM 233			0.703479	2e-05	GeoReM 1209	0.512976	2e-06	GeoReM 11443														0.513062	1.3e-05	GeoReM 6380
				0.512604	7e-06	GeoReM 2620			0.703488	2e-06	GeoReM 12101	0.512986	1e-06	GeoReM 11660														0.513063	1.3e-05	GeoReM 7545
				0.512634	1.6e-05	GeoReM 2990			0.703487	1.9e-05	GeoReM 12507	0.512973	3e-06	GeoReM 11776														0.513049	3e-06	GeoReM 7820
				0.512604	7e-06	GeoReM 3020			0.703485	1.7e-05	GeoReM 1810	0.512981	7e-06	GeoReM 12039														0.513044	1.7e-05	GeoReM 7820
				0.512636	5e-06	GeoReM 3060			0.703491	8e-06	GeoReM 3954	0.512982	1e-05	GeoReM 12051														0.513047	1.2e-05	GeoReM 7820
				0.512602	1e-05	GeoReM 3065			0.703495	8e-06	GeoReM 4049	0.512981	1e-05	GeoReM 1209														0.513091	5e-06	GeoReM 7916
				0.512626	9e-06	GeoReM 3066			0.703473	8e-06	GeoReM 4122	0.512984	1.1e-05	GeoReM 1209														0.513037	5e-06	GeoReM 8244
				0.512604	1.2e-05	GeoReM 307			0.703473	8e-06	GeoReM 4485	0.512957	1e-05	GeoReM 12101														0.513065	1.2e-05	GeoReM 8286
				0.512602	1e-05	GeoReM 3716			0.70346	7e-06	GeoReM 4507	0.512963	2e-05	GeoReM 2992														0.513041	5e-06	GeoReM 8375
				0.512638	1.6e-05	GeoReM 3726			0.703495	1.1e-05	GeoReM 4775	0.512984	1.1e-05	GeoReM 3164														0.513057	6e-06	GeoReM 8455
				0.512634	1.6e-05	GeoReM 3726			0.703462	9e-06	GeoReM 480	0.513002	1.4e-05	GeoReM 3164														0.513054	8e-06	GeoReM 8688
				0.512638	1.3e-05	GeoReM 3767			0.703469	9e-06	GeoReM 480	0.512996	1.2e-05	GeoReM 3164														0.513061	1.2e-05	GeoReM 8688
				0.512635	1.7e-05	GeoReM 3995			0.703469	8e-06	GeoReM 480	0.512989	9e-06	GeoReM 3164														0.513041	5e-06	GeoReM 8878
				0.512604	7e-06	GeoReM 4064			0.703495	1.1e-05	GeoReM 5904	0.512971	5e-06	GeoReM 3954														0.513041	5e-06	GeoReM 9211
				0.512604	7e-06	GeoReM 4163			0.703468	1.4e-05	GeoReM 6081	0.512971	6e-06	GeoReM 4049														0.513053	1.8e-05	GeoReM 9725
				0.512602	1e-05	GeoReM 4191			0.703507	8e-06	GeoReM 6117	0.512978	6e-06	GeoReM 4507														0.513041	5e-06	GeoReM 9841
				0.512634	1.6e-05	GeoReM 4213			0.703488	7e-06	GeoReM 6181	0.512951	1e-05	GeoReM 4680														0.513065	2e-06	GeoReM 9936
				0.512624	1.1e-05	GeoReM 4299			0.703417	9e-06	GeoReM 6195	0.512987	1e-05	GeoReM 4775
				0.512604	7e-06	GeoReM 4312			0.703477	1.7e-05	GeoReM 6543	0.512963	2e-05	GeoReM 4780
				0.512604	7e-06	GeoReM 4484			0.703477	1.7e-05	GeoReM 6734	0.513005	7e-06	GeoReM 5454
				0.512633	6e-06	GeoReM 4764			0.703445	9e-06	GeoReM 6782	0.512967	6e-06	GeoReM 5470
				0.512626	9e-06	GeoReM 4793			0.703498	6e-06	GeoReM 6945	0.512987	1e-05	GeoReM 5904
				0.512593	1.6e-05	GeoReM 513			0.703498	6e-06	GeoReM 6946	0.512986	2e-06	GeoReM 5985
				0.512621	2e-05	GeoReM 5212			0.703438	7e-06	GeoReM 7445	0.512989	5e-06	GeoReM 5985
				0.512604	7e-06	GeoReM 5304			0.703459	8e-06	GeoReM 7783	0.512968	4e-06	GeoReM 6117
				0.512634	9e-06	GeoReM 5840			0.703462	8e-06	GeoReM 7783	0.512987	5e-06	GeoReM 6181
				0.512626	1e-05	GeoReM 5904			0.703469	5e-06	GeoReM 7864	0.512963	2e-05	GeoReM 6196
				0.512633	1.9e-05	GeoReM 6326			0.703469	1.2e-05	GeoReM 8150	0.512967	6e-06	GeoReM 6242
				0.512632	7e-06	GeoReM 6326			0.703486	9e-06	GeoReM 8370	0.513	1.5e-05	GeoReM 6338
				0.512625	8e-06	GeoReM 6336			0.703472	3e-06	GeoReM 8428	0.512974	1.1e-05	GeoReM 6543
				0.512604	7e-06	GeoReM 6378			0.703489	1.1e-05	GeoReM 8478	0.512974	2e-06	GeoReM 6734
				0.512638	4e-06	GeoReM 6680			0.703459	1.2e-05	GeoReM 8625	0.512976	1.5e-05	GeoReM 6937
				0.512604	7e-06	GeoReM 6733			0.703465	1.4e-05	GeoReM 8688	0.512975	3e-06	GeoReM 6945
				0.512634	1.8e-05	GeoReM 6962			0.703468	1.4e-05	GeoReM 8688	0.512975	3e-06	GeoReM 6946
				0.512604	7e-06	GeoReM 7260			0.703459	8e-06	GeoReM 8883	0.512975	6e-06	GeoReM 7445
				0.512625	1.8e-05	GeoReM 753			0.703462	8e-06	GeoReM 8883	0.512967	6e-06	GeoReM 7814
				0.512626	9e-06	GeoReM 7635			0.703474	6e-06	GeoReM 8975	0.512976	1.2e-05	GeoReM 8150
				0.512625	9e-06	GeoReM 7748			0.703475	7e-06	GeoReM 8975	0.513003	7e-06	GeoReM 8370
				0.512629	2e-06	GeoReM 7749			0.703455	8e-06	GeoReM 9116	0.512995	1.5e-05	GeoReM 8478
				0.512623	1e-05	GeoReM 7750			0.703483	7e-06	GeoReM 9116	0.512968	1.4e-06	GeoReM 8496
				0.512636	5e-06	GeoReM 7950			0.703508	1.7e-05	GeoReM 9139	0.512978	1.5e-05	GeoReM 8625
				0.512638	5e-06	GeoReM 7990			0.703484	1.9e-05	GeoReM 9704	0.512963	8e-06	GeoReM 8975
				0.512626	9e-06	GeoReM 8059			0.703493	1.1e-05	GeoReM 9808	0.512978	7e-06	GeoReM 8975
				0.512621	2e-05	GeoReM 8126			0.703523	4e-06	GeoReM 9940	0.512978	5e-06	GeoReM 9116
				0.512636	1.6e-05	GeoReM 8418						0.512977	5e-06	GeoReM 9116
				0.512634	1.8e-05	GeoReM 8423						0.512979	3e-06	GeoReM 9139
				0.512626	9e-06	GeoReM 8621						0.512965	2e-06	GeoReM 9247
				0.512626	9e-06	GeoReM 8870						0.512976	3e-06	GeoReM 9704
				0.512626	9e-06	GeoReM 8900						0.512993	1e-05	GeoReM 9808
				0.512626	9e-06	GeoReM 9053
[truncated: 11 more columns]
